# Supplementary material
Source: PubMed Central journal article supplement (PMC10052213)
Supplement: NEJMc2103916_appendix.pdf [file NEJMc2103916_appendix.pdf]

## Supplementary Appendix

This appendix has been provided by the authors to give readers additional information about their work.

Supplement to: Doria-Rose N, Suthar MS, Makowski M, et al. Antibody persistence through 6 months after the second dose of mRNA-1273 vaccine for Covid-19. *N Engl J Med* 2021;384:2259-60. DOI: 10.1056/NEJMc2103916

(PDF last updated January 19, 2022)

1 **Supplementary Appendix**

2

3 **Table of Contents**

4 \*mRNA-1273 Study Group ..... 2

5 Supplemental Methods..... 4

6 Samples..... 4

7 Statistical Analysis..... 4

8 Supplemental Tables..... 6

9 Supplemental Table 1: Serum RBD-Binding IgG ELISA Geometric Mean Titer (GMT)  
10 Results with 95% Confidence Intervals by Time Point and Age Group ..... 6

11 Supplemental Table 2: Pseudovirus Neutralization Assay ID<sub>50</sub> Geometric Mean (GM)  
12 Results with 95% Confidence Intervals by Time Point and Age Group ..... 7

13 Supplemental Table 3: FRNT mNG Geometric Mean (GM) ID<sub>50</sub> Results with 95%  
14 Confidence Intervals by Time Point and Age Group..... 8

15 Supplemental Table 4: Estimates of antibody half-life..... 9

16 Supplemental Figure 1 ..... 10

17 References..... 11

18

19

20

21

22 **\*mRNA-1273 Study Group**

23 **(listed in pubmed, and ordered alphabetically by institutional affiliation)**

24

25 The following study group members were all closely involved with the design, implementation,  
26 and oversight of the mRNA-1273 clinical trial.

27

28 Division of Microbiology and Infectious Diseases, National Institute of Allergy and Infectious  
29 Diseases, National Institutes of Health, Bethesda, MD. Jae Arega, M.S., John H. Beigel, M.D.,  
30 Wendy Buchanan, M.S., B.S.N., Mohammed Elsafy, M.D., Binh Hoang, Pharm.D., Rebecca  
31 Lampley, M.Sc., Sonnie Kim, M.Sc., Aparna Kolhekar, Ph.D., Hyung Koo, B.S.N., Catherine  
32 Luke, Ph.D., Mamodikoe Makhene, M.D., M.P.H., Seema Nayak, M.D., Rhonda Pikaart-  
33 Tautges, B.S., Paul C. Roberts, Ph.D., Janie Russell, B.S., Elisa Sindall, B.S.N.

34

35 The Emmes Company, LLC, Rockville, MD. Jim Albert, M.S., Pratap Kunwar, M.S., Mat  
36 Makowski, Ph.D.

37

38 Emory University School of Medicine, Atlanta, GA. Evan J. Anderson, M.D., Amer Bechnak,  
39 M.D., Mary Bower, R.N., Andres F. Camacho-Gonzalez, M.D., M.Sc., Matthew Collins, M.D.,  
40 Ph.D., Ana Drobeniuc, M.P.H., Venkata Viswanadh Edara, Ph.D., Srilatha Edupuganti, M.D.,  
41 M.P.H., Katharine Floyd, Theda Gibson, M.S., Cassie M. Grimsley Ackerley, M.D., Brandi  
42 Johnson, Satoshi Kamidani, M.D., Carol Kao, M.D.; Colleen Kelley, M.D., M.P.H., Lilin Lai,  
43 M.D., Hollie Macenczak, R.N., Michele Paine McCullough, M.P.H., Etza Peters, R.N., Varun  
44 K. Phadke, M.D., Christina A. Rostad, M.D., Nadine Rouphael, M.D., Erin Scherer Ph.D.,  
45 D.Phil., Amy Sherman, M.D., Kathy Stephens, R.N., Mehul S. Suthar, Ph.D., Mehgan Teherani,  
46 M.D., M.S., Jessica Traenkner, P.A., Juton Winston., Veronika Zarnitsyna, Ph.D.

47

48 Kaiser Permanente Washington Health Research Institute, Seattle, WA. Lee Barr, R.N., Joyce  
49 Benoit, R.N., Heather Beseler, M.B.A., Rachael Burganowski, M.S., Barbara Carste, M.P.H., Joe  
50 Choe, B.S., John Dunn, M.D., M.P.H., Maya Dunstan, M.S., R.N., Roxanne Erolin, M.P.H., Jana  
51 ffitich, L.P.N., Colin Fields, M.D., Lisa A. Jackson, M.D., Erika Kiniry, M.P.H., De Vona Lang,  
52 L.M.P., Susan Lasicka, R.Ph., Stella Lee, B.A., Matthew Nguyen, M.P.H., Jennifer Nielsen,  
53 M.N., A.R.N.P., Hallie Phillips, M.ed., Stephanie Pimienta, B.S., David Skatula, R.Ph., Janice  
54 Suyehira, M.D., Karen Wilkinson, M.N., A.R.N.P., Michael Witte, Pharm.D.

55 Moderna, Inc., Cambridge, MA. Hamilton Bennett, M.Sc., Nedim Emil Altaras, Ph.D., Andrea  
56 Carfi, Ph.D., Marjorie Hurley, Pharm.D., Brett Leav, M.D., Rolando Pajon, Ph.D., Wellington  
57 Sun, M.D., Tal Zaks, M.D., Ph.D.

58

59 Seattle Children's Research Institute, Seattle, WA. Rhea N. Coler, M.Sc., Ph.D., Sasha E.  
60 Larsen, Ph.D.

61

62 University of Maryland School of Medicine, Baltimore, MD. Kathleen M. Neuzil, M.D.

63

64 University of North Carolina, Durham, NC. Lisa C. Lindesmith, M.S., David R. Martinez, Ph.D.,  
65 Jennifer Munt, B.S., Michael Mallory, M.P.H., Caitlin Edwards, B.S., Ralph S. Baric, Ph.D.

66

67 Vaccine Research Center, National Institute of Allergy and Infectious Diseases, National  
68 Institutes of Health, Bethesda, M.D. Nina M. Berkowitz, M.P.H., Kevin Carlton, M.S.,  
69 Kizzmekia S. Corbett, Ph.D., Pamela Costner, R.N., B.S.N., Nicole A. Doria-Rose, Ph.D., Britta  
70 Flach, Ph.D., Martin Gaudinski, M.D., Ingelise Gordon, R.N., Barney S. Graham, M.D., LaSonji  
71 Holman, F.N.P., Julie E. Ledgerwood, D.O., Bob C. Lin, B.S., Mark K. Louder, John R.  
72 Mascola, M.D., Adrian B. McDermott, Ph.D., Kaitlyn M. Morabito, Ph.D., Laura Novik, R.N.,  
73 M.A., Sarah O'Connell, M.S., Sijy O'Dell, M.S., Marcelino Padilla, B.S., Amarendra Pegu,  
74 Ph.D, Stephen D. Schmidt, B.S., Phillip A. Swanson II, Ph.D., Lingshu Wang, Ph.D., Alicia T.  
75 Widge, M.D., M.S., Eun Sung Yang M.S., Yi Zhang B.S.

76  
77 Vanderbilt University Medical Center, Nashville, TN. James D. Chappell, M.D., Ph.D., Mark R.  
78 Denison, M.D., Tia Hughes, M.S., Xiaotao Lu, M.S., Andrea J. Pruijssers, Ph.D., Laura J.  
79 Stevens, M.S.

80  
81 Fred Hutchinson Cancer Research Center, Seattle WA. Christine M. Posavad, Ph.D

82  
83 University of Washington, Seattle, WA. Michael Gale, Jr., Ph.D.

84  
85 University of Texas Medical Branch, Galveston, TX. Vineet Menachery, Ph.D., Pei-Yong Shi,  
86 Ph.D.

87  
88  
89

90 **Supplemental Methods**

91

92 **Samples.** Day 43 and 57 data are missing for one 18-55 year-old participant, and for Day 209 for  
93 one subject in the 71+ group, because they did not have samples collected at those time points. In  
94 addition, one subject in the 56-70 group did not get the second dose, therefore data after Day 29  
95 were not included in analysis.

96

97 **Statistical Analysis.** Confidence intervals of the geometric means were calculated with the  
98 Student's t distribution on log-transformed data and then back transformed. Age group titers were  
99 compared using the Kruskal-Wallis test and, if significant, individual pairs were compared using  
100 the Wilcoxon test. Antibody decay rates and half-life were calculated using both exponential and  
101 power law models fit to data starting at Study Day 43 and beyond. Both models were implemented,  
102 and 95% confidence interval of fixed effects computed using the lme4 package in R 3.6.3 or higher.  
103 95% confidence intervals of fixed effects are calculated by computing a likelihood profile and  
104 finding the appropriate cut-offs based on the likelihood ratio test as implemented in the lme4  
105 package<sup>1</sup>. The exponential model after log<sub>10</sub> transformation of titers takes the following form<sup>2</sup>:

106

$$\log_{10}(Titer_{ij}) = \alpha + \beta * (study\ day_{ij}) + u_i + e_{ij}$$

107

108

109

110

where  $\alpha$  and  $\beta$  are the fixed effects, intercept and decay rate, respectively.  $u_i$  is the random  
intercept for each participant  $i$  and  $e_{ij}$  are the model errors for participant  $i$  at study day  $j$ . The  
fixed effect decay rate and 95% confidence intervals are reported. The half-life was calculated  
using the following formula:

111

$$t_{1/2} = \frac{\log_{10}(0.5)}{\hat{\beta}}$$

112 Where  $t_{1/2}$  is the day when the titer has decayed to half of its starting value and  $\hat{\beta}$  is the  
113 estimated model decay rate. The 95% confidence interval of the half-life was computed using the  
114 delta method. The power law model after  $\log_{10}$  transformation of titers and study day takes the  
115 following form<sup>3</sup>:

$$116 \quad \log_{10}(Titer_{ij}) = \alpha + \beta * (\log_{10}(study\ day_{ij} - 29)) + u_i + e_{ij}$$

117 where  $\alpha$  and  $\beta$  are the fixed effects, intercept and decay rate, respectively.  $u_i$  is the random  
118 intercept for each participant and  $e_{ij}$  are the model errors for participant  $i$  at study day  $j$ . Study  
119 day was offset by 29 days to account for the 2 dose regimen. The fixed effect decay rate and 95%  
120 confidence intervals are reported. The half-life was calculated using the following formula:

$$121 \quad \log_{10}(t_{1/2}) = \log_{10}(study\ day - 29) + \frac{\log_{10}(0.5)}{\hat{\beta}}$$

122 Where  $t_{1/2}$  is the day when the titer has decayed to half of its starting value and  $\hat{\beta}$  is the  
123 estimated model decay rate. The 95% confidence interval of the half-life was computed  
124 using 1000 bootstrap simulations. Model fit was compared using the  $AIC_c$  criteria. This is AIC  
125 with a small sample size correction.

126

127 Supplemental Tables

128 Supplemental Table 1: Serum RBD-Binding IgG ELISA Geometric Mean Titer (GMT)

129 Results with 95% Confidence Intervals by Time Point and Age Group

130

| Time Point                                                          | Statistic | 100 mcg mRNA-1273<br>18-55 years<br>(N=15) | 100 mcg mRNA-1273<br>56-70 years<br>(N=10) | 100 mcg mRNA-1273<br>≥71 years<br>(N=10) | 100 mcg mRNA-1273<br>(N=35) |
|---------------------------------------------------------------------|-----------|--------------------------------------------|--------------------------------------------|------------------------------------------|-----------------------------|
| <b>Day 1<br/>(Pre-Vaccination 1)</b>                                | n         | 15                                         | 10                                         | 10                                       | 35                          |
|                                                                     | GMT       | 166                                        | 223                                        | 503                                      | 248                         |
|                                                                     | 95% CI    | 82, 337                                    | 64, 775                                    | 174, 1455                                | 148, 417                    |
| <b>Day 15<br/>(14 Days Post Vaccination 1)</b>                      | n         | 15                                         | 10                                         | 10                                       | 35                          |
|                                                                     | GMT       | 34073                                      | 30981                                      | 25670                                    | 30582                       |
|                                                                     | 95% CI    | 21688, 53531                               | 15901, 60362                               | 12394, 53168                             | 22524, 41523                |
| <b>Day 29 Post Vaccination 1<br/>(Pre-Vaccination 2)</b>            | n         | 15                                         | 10                                         | 10                                       | 35                          |
|                                                                     | GMT       | 93231                                      | 45690                                      | 56343                                    | 65852                       |
|                                                                     | 95% CI    | 59895, 145123                              | 26314, 79330                               | 35052, 90567                             | 50065, 86618                |
| <b>Day 36 Post Vaccination 1<br/>(7 Days Post Vaccination 2)</b>    | n         | 15                                         | 9                                          | 10                                       | 34                          |
|                                                                     | GMT       | 499539                                     | 1471882                                    | 711752                                   | 737938                      |
|                                                                     | 95% CI    | 400950, 622370                             | 560108, 3867893                            | 368657, 1374153                          | 531937, 1023717             |
| <b>Day 43 Post Vaccination 1<br/>(14 Days Post Vaccination 2)</b>   | n         | 14                                         | 9                                          | 10                                       | 33                          |
|                                                                     | GMT       | 558905                                     | 1005639                                    | 694471                                   | 700636                      |
|                                                                     | 95% CI    | 462908, 674810                             | 445521, 2269948                            | 465032, 1037111                          | 549265, 893723              |
| <b>Day 57 Post Vaccination 1<br/>(28 Days Post Vaccination 2)</b>   | n         | 14                                         | 9                                          | 10                                       | 33                          |
|                                                                     | GMT       | 371271                                     | 506364                                     | 453506                                   | 429317                      |
|                                                                     | 95% CI    | 266721, 516804                             | 235654, 1088051                            | 255624, 804573                           | 327770, 562325              |
| <b>Day 119 Post Vaccination 1<br/>(90 Days Post Vaccination 2)</b>  | n         | 15                                         | 9                                          | 10                                       | 34                          |
|                                                                     | GMT       | 235228                                     | 151761                                     | 157946                                   | 186308                      |
|                                                                     | 95% CI    | 177236, 312195                             | 88571, 260033                              | 94345, 264420                            | 148772, 233314              |
| <b>Day 209 Post Vaccination 1<br/>(180 Days Post Vaccination 2)</b> | n         | 15                                         | 9                                          | 9                                        | 33                          |
|                                                                     | GMT       | 92451                                      | 62424                                      | 49373                                    | 70000                       |
|                                                                     | 95% CI    | 57148, 149562                              | 36765, 105990                              | 25171, 96849                             | 51866, 94474                |

131

132

133 **Supplemental Table 2: Pseudovirus Neutralization Assay ID<sub>50</sub> Geometric Mean (GM)**  
 134 **Results with 95% Confidence Intervals by Time Point and Age Group**  
 135

| <b>Time Point</b>                                                   | <b>Statistic</b> | <b>100 mcg mRNA-1273<br/>18-55 years<br/>(N=15)</b> | <b>100 mcg mRNA-1273<br/>56-70 years<br/>(N=10)</b> | <b>100 mcg mRNA-1273<br/>≥71 years<br/>(N=10)</b> | <b>100 mcg mRNA-1273<br/>(N=35)</b> |
|---------------------------------------------------------------------|------------------|-----------------------------------------------------|-----------------------------------------------------|---------------------------------------------------|-------------------------------------|
| <b>Day 1<br/>(Pre-Vaccination 1)</b>                                | n                | 15                                                  | 10                                                  | 10                                                | 35                                  |
|                                                                     | GMT              | 10                                                  | 10                                                  | 10                                                | 10                                  |
|                                                                     | 95% CI           | NE                                                  | NE                                                  | NE                                                | NE                                  |
| <b>Day 15<br/>(14 Days Post Vaccination 1)</b>                      | n                | 15                                                  | 10                                                  | 10                                                | 35                                  |
|                                                                     | GMT              | 24                                                  | 12                                                  | 27                                                | 20                                  |
|                                                                     | 95% CI           | 13, 42                                              | 10, 15                                              | 12, 60                                            | 15, 28                              |
| <b>Day 29 Post Vaccination 1<br/>(Pre-Vaccination 2)</b>            | n                | 15                                                  | 10                                                  | 10                                                | 35                                  |
|                                                                     | GMT              | 18                                                  | 11                                                  | 20                                                | 16                                  |
|                                                                     | 95% CI           | 12, 27                                              | 10, 12                                              | 12, 33                                            | 13, 20                              |
| <b>Day 36 Post Vaccination 1<br/>(7 Days Post Vaccination 2)</b>    | n                | 15                                                  | 9                                                   | 10                                                | 34                                  |
|                                                                     | GMT              | 263                                                 | 340                                                 | 310                                               | 295                                 |
|                                                                     | 95% CI           | 188, 368                                            | 219, 527                                            | 202, 475                                          | 241, 363                            |
| <b>Day 43 Post Vaccination 1<br/>(14 Days Post Vaccination 2)</b>   | n                | 14                                                  | 9                                                   | 10                                                | 33                                  |
|                                                                     | GMT              | 360                                                 | 404                                                 | 317                                               | 358                                 |
|                                                                     | 95% CI           | 273, 476                                            | 292, 561                                            | 198, 508                                          | 297, 430                            |
| <b>Day 57 Post Vaccination 1<br/>(28 Days Post Vaccination 2)</b>   | n                | 14                                                  | 9                                                   | 10                                                | 33                                  |
|                                                                     | GMT              | 276                                                 | 424                                                 | 231                                               | 294                                 |
|                                                                     | 95% CI           | 193, 393                                            | 267, 673                                            | 150, 356                                          | 235, 368                            |
| <b>Day 119 Post Vaccination 1<br/>(90 Days Post Vaccination 2)</b>  | n                | 15                                                  | 9                                                   | 10                                                | 34                                  |
|                                                                     | GMT              | 182                                                 | 167                                                 | 109                                               | 153                                 |
|                                                                     | 95% CI           | 112, 296                                            | 88, 318                                             | 68, 175                                           | 115, 203                            |
| <b>Day 209 Post Vaccination 1<br/>(180 Days Post Vaccination 2)</b> | n                | 15                                                  | 9                                                   | 9                                                 | 33                                  |
|                                                                     | GMT              | 80                                                  | 57                                                  | 59                                                | 67                                  |
|                                                                     | 95% CI           | 48, 135                                             | 30, 106                                             | 29, 121                                           | 49, 92                              |

136

137



138 **Supplemental Table 3: FRNT mNG Geometric Mean (GM) ID<sub>50</sub> Results with 95%**  
 139 **Confidence Intervals by Time Point and Age Group**  
 140

| <b>Time Point</b>                                                   | <b>Statistic</b> | <b>100 mcg mRNA-1273<br/>18-55 years<br/>(N=15)</b> | <b>100 mcg mRNA-1273<br/>56-70 years<br/>(N=10)</b> | <b>100 mcg mRNA-1273<br/>≥71 years<br/>(N=10)</b> | <b>100 mcg mRNA-1273<br/>(N=35)</b> |
|---------------------------------------------------------------------|------------------|-----------------------------------------------------|-----------------------------------------------------|---------------------------------------------------|-------------------------------------|
| <b>Day 1<br/>(Pre-Vaccination 1)</b>                                | n                | 15                                                  | 10                                                  | 10                                                | 35                                  |
|                                                                     | GMT              | 10                                                  | 10                                                  | 10                                                | 10                                  |
|                                                                     | 95% CI           | NE                                                  | NE                                                  | NE                                                | NE                                  |
| <b>Day 29 Post Vaccination 1<br/>(Pre-Vaccination 2)</b>            | n                | 15                                                  | 10                                                  | 10                                                | 35                                  |
|                                                                     | GMT              | 69                                                  | 80                                                  | 39                                                | 61                                  |
|                                                                     | 95% CI           | 46, 102                                             | 52, 123                                             | 18, 86                                            | 46, 82                              |
| <b>Day 43 Post Vaccination 1<br/>(14 Days Post Vaccination 2)</b>   | n                | 14                                                  | 9                                                   | 10                                                | 33                                  |
|                                                                     | GMT              | 1388                                                | 1425                                                | 900                                               | 1226                                |
|                                                                     | 95% CI           | 1056, 1825                                          | 980, 2072                                           | 575, 1409                                         | 1008, 1491                          |
| <b>Day 119 Post Vaccination 1<br/>(90 Days Post Vaccination 2)</b>  | n                | 15                                                  | 9                                                   | 10                                                | 34                                  |
|                                                                     | GMT              | 775                                                 | 685                                                 | 552                                               | 679                                 |
|                                                                     | 95% CI           | 560, 1071                                           | 436, 1077                                           | 321, 947                                          | 543, 848                            |
| <b>Day 209 Post Vaccination 1<br/>(180 Days Post Vaccination 2)</b> | n                | 15                                                  | 9                                                   | 9                                                 | 33                                  |
|                                                                     | GMT              | 361                                                 | 171                                                 | 131                                               | 236                                 |
|                                                                     | 95% CI           | 258, 504                                            | 95, 307                                             | 69, 251                                           | 173, 321                            |

Note: N=Number of Subjects.  
 n=Number of subjects with results available at time point.  
 NE=Not Estimable

141  
 142

143 **Supplemental Table 4: Estimates of antibody half-life**

144

| Assay                      | Age Group   | Model                         | Decay Rate                    | Half-Life (days)     | $\Delta AIC_c$ |
|----------------------------|-------------|-------------------------------|-------------------------------|----------------------|----------------|
| ELISA RBD                  | Overall 1   | Exponential                   | -0.00579 (-0.00649, -0.00509) | 52.0 (45.8, 58.3)    | 8.8            |
|                            |             | Power Law                     | -0.876 (-0.982, -0.768)       | 108.6 (91.7, 135.8)  |                |
|                            | 18-55 Years | Exponential                   | -0.00440 (-0.00521, -0.00360) | 68.4 (56.0, 80.8)    | 4.3            |
|                            |             | Power Law                     | -0.654 (-0.786, -0.522)       | 169.7 (124.5, 263.1) |                |
|                            | 56-70 Years | Exponential                   | -0.00689 (-0.00865, -0.00512) | 43.7 (32.7, 54.7)    | 14.2           |
|                            |             | Power Law                     | -1.079 (-1.326, -0.831)       | 81.1 (62.2, 116.9)   |                |
| $\geq 71$ Years            | Exponential | -0.00695 (-0.00797, -0.00591) | 43.3 (37.0, 49.6)             | 5.0                  |                |
|                            | Power Law   | -1.024 (-1.192, -0.853)       | 87.1 (69, 117.7)              |                      |                |
| Pseudovirus Neutralization | Overall 1   | Exponential                   | -0.00439 (-0.00485, -0.00393) | 68.6 (61.4, 75.7)    | -8.7           |
|                            |             | Power Law                     | -0.646 (-0.7226, -0.569)      | 173.4 (143.7, 225.2) |                |
|                            | 18-55 Years | Exponential                   | -0.0038 (-0.00451, -0.00309)  | 79.2 (64.6, 93.9)    | 3.1            |
|                            |             | Power Law                     | -0.558 (-0.676, -0.440)       | 221.5 (154.1, 398.3) |                |
|                            | 56-70 Years | Exponential                   | -0.00541 (-0.0062, -0.00462)  | 55.6 (47.6, 63.6)    | -5.1           |
|                            |             | Power Law                     | -0.775 (-0.936, -0.615)       | 130.1 (95.5, 198.9)  |                |
| $\geq 71$ Years            | Exponential | -0.00432 (-0.00516, -0.00348) | 69.7 (56.4, 83)               | 12.7                 |                |
|                            | Power Law   | -0.655 (-0.775, -0.535)       | 169.3 (123.6, 265)            |                      |                |
| FRNT-mNG                   | Overall 1   | Exponential                   | -0.00459(-0.00504,-0.00413)   | 65.6 (59.2,72)       | -35.0          |
|                            |             | Power Law                     | -0.605 (-0.698,-0.512)        | 181.7 (152.9, 254.4) |                |
|                            | 18-55 Years | Exponential                   | -0.00364 (-0.00417,-0.00310)  | 82.7 (70.7,94.7)     | -4.2           |
|                            |             | Power Law                     | -0.503 (-0.602,-0.401)        | 231 (187.1,444.2)    |                |
|                            | 56-70 Years | Exponential                   | -0.00559 (-0.00632,-0.00485)  | 53.9 (47.0, 60.8)    | -10.2          |
|                            |             | Power Law                     | -0.740 (-0.932, -0.548)       | 139.6 (99.5, 230.9)  |                |
| $\geq 71$ Years            | Exponential | -0.00511 (-0.00607, -0.00415) | 58.9 (48.1, 69.6)             | -6.4                 |                |
|                            | Power Law   | -0.640 (-0.853, -0.426)       | 176 (114.7, 350)              |                      |                |

Note: Power Law half-lives estimated at Day 119.  
 $\Delta AIC_c = AIC_c(\text{exponential}) - AIC_c(\text{Power Law})$ . So positive  $\Delta AIC_c$  are evidence that the power law model fits better and negative values are evidence that the exponential model fits better.

145

146

147

148

149

150

151

152

153

154

155 **Supplemental Figure 1**  
156

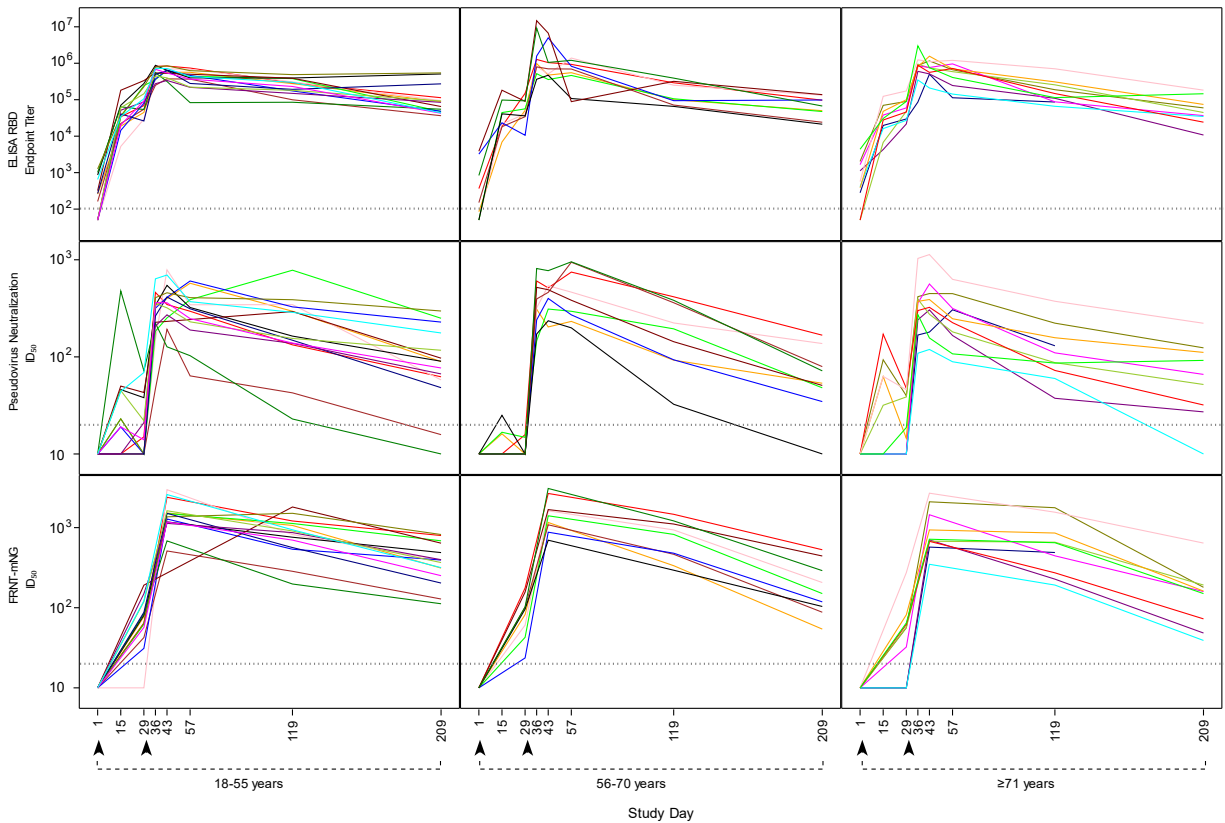

157 **Supplemental Figure 1.** Each line represents a single subject over time. Data from 35 subjects  
158 are stratified by age: 18-55 (n=15), 56-70 (n=10), and ≥71 (n=10) years old. Dotted line indicates  
159 the limit of detection for each assay. Panels, in vertical order, show binding to RBD protein  
160 (endpoint dilution titer) on days 1, 15, 29, 36, 43, 57, 119, and 209; pseudovirus neutralization  
161 50% inhibitory dilution (ID<sub>50</sub>) titer on days 1, 15, 29, 36, 43, 57, 119, and 209; and focus-reduction  
162 neutralization mNeonGreen (FRNT-mNG) assay ID<sub>50</sub> titer on days 1, 29, 43, 119, and 209. Arrows  
163 represent vaccination time points: 100 mcg of mRNA-1273 on days 1 and 29.  
164

165  
166  
167

168 **References**

169

170

171 1. Bates D, Mächler M, Bolker B, Walker S. Fitting Linear Mixed-Effects Models Using

172 lme4. 2015 2015;67:48 %J Journal of Statistical Software.

173 2. Antia A, Ahmed H, Handel A, et al. Heterogeneity and longevity of antibody memory to

174 viruses and vaccines. PLoS Biol 2018;16:e2006601.

175 3. Yu YP, Chen JT, Jiang ZW, et al. Modeling the Long-term Antibody Response and

176 Duration of Immune Protection Induced by an Inactivated, Preservative-free Hepatitis A Vaccine

177 (Healive) in Children. Biomedical and Environmental Sciences 2020;33:484-92.

178
